# Supplementary material
Source: Springer Nature journal article supplement (https://www.springermedizin.de/resource/supplementary/13058_2013_3451_MOESM8_ESM.pdf/9704056)

**A EP premenopausal**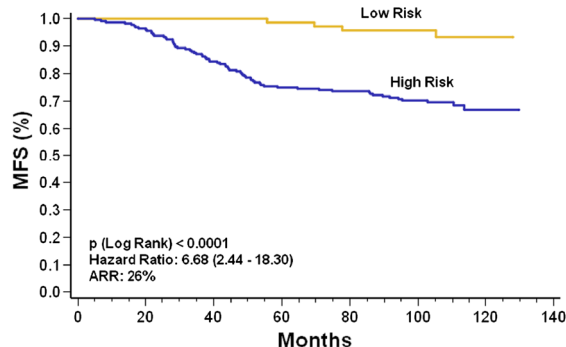**EP postmenopausal**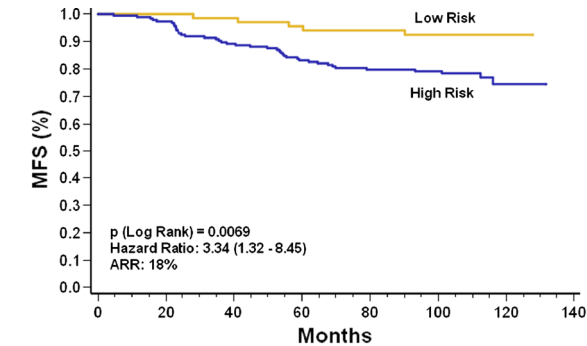**B EPclin premenopausal**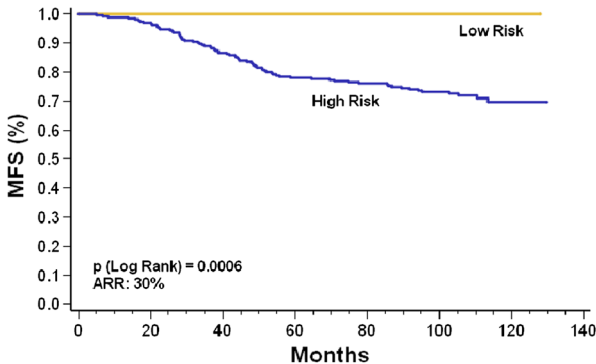**EPclin postmenopausal**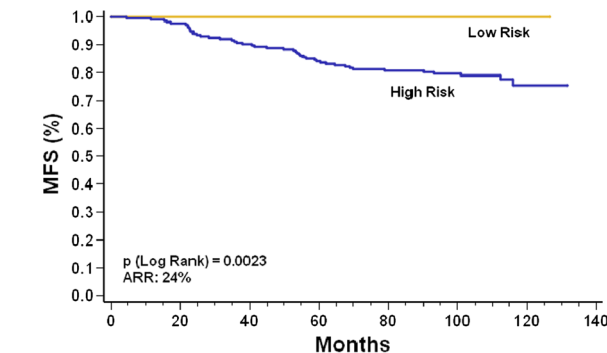

Supplement: MOESM8 [file 9704056]
